# Supplementary material
Source: Research Square preprint supplement (doi:10.21203/rs.3.rs-9386274/v1)
Supplement: Supplementary file 1 [file 91a715d70d7025a46132d420.docx]

**Table S1** The primers used in this work.

| Gene | | 5’- to 3’- sequences |
| --- | --- | --- |
| *PzDNT2*-F | ATGGGTCGCGGATCCGAATTCAATAAATATGAATGTACTAAAACTAAAACTAGACC | |
| *PzDNT2*-R | GTGGTGGTGGTGGTGCTCGAGATTATTTTTCAAATCATTTTCTGTAATTACG | |
| *PzDNT3*-F | ATGGGTCGCGGATCCGAATTCAATAAAGAAAATTGTAATAAGTATAAAATGCG | |
| *PzDNT3*-R | GTGGTGGTGGTGGTGCTCGAGTTTTAAATTTTTTTGACGAACTATGCA | |
| *PzDNT8*-F | ATGGGTCGCGGATCCGAATTCATGACCAATACAATAAATGAAGTAAAACA | |
| *PzDNT8*-R | GTGGTGGTGGTGGTGCTCGAGTTGATTTCTTTTTTGTTGTAAATCATTT | |


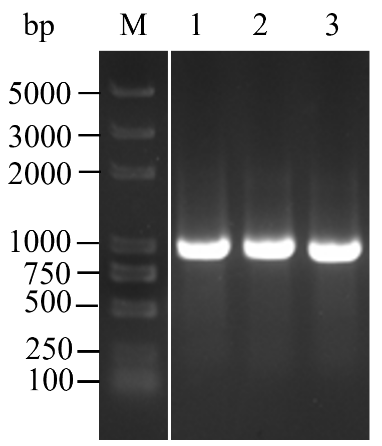


**Fig.S1** Electrophoresis detection of dermonecrotic toxin genes in *P. zhonghuajia.* M, DL2000 Plus Marke; 1, PzDNT2; 2, PzDNT3; 3, PzDNT8


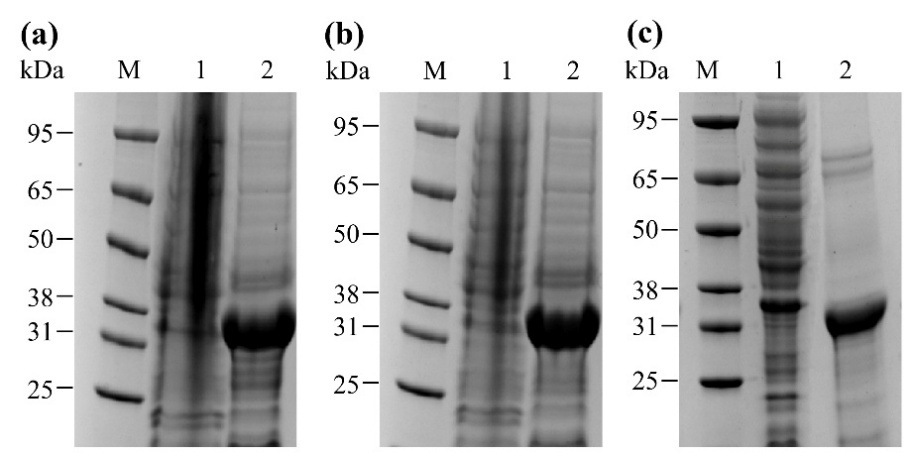


**Fig.S2** Identification of the recombinant proteins. (a) PzDNT2; (b) PzDNT3; (c) PzDNT8; M, Molecular weight marker; Lane 1: the soluble supernatant; Lane 2: inclusion bodies


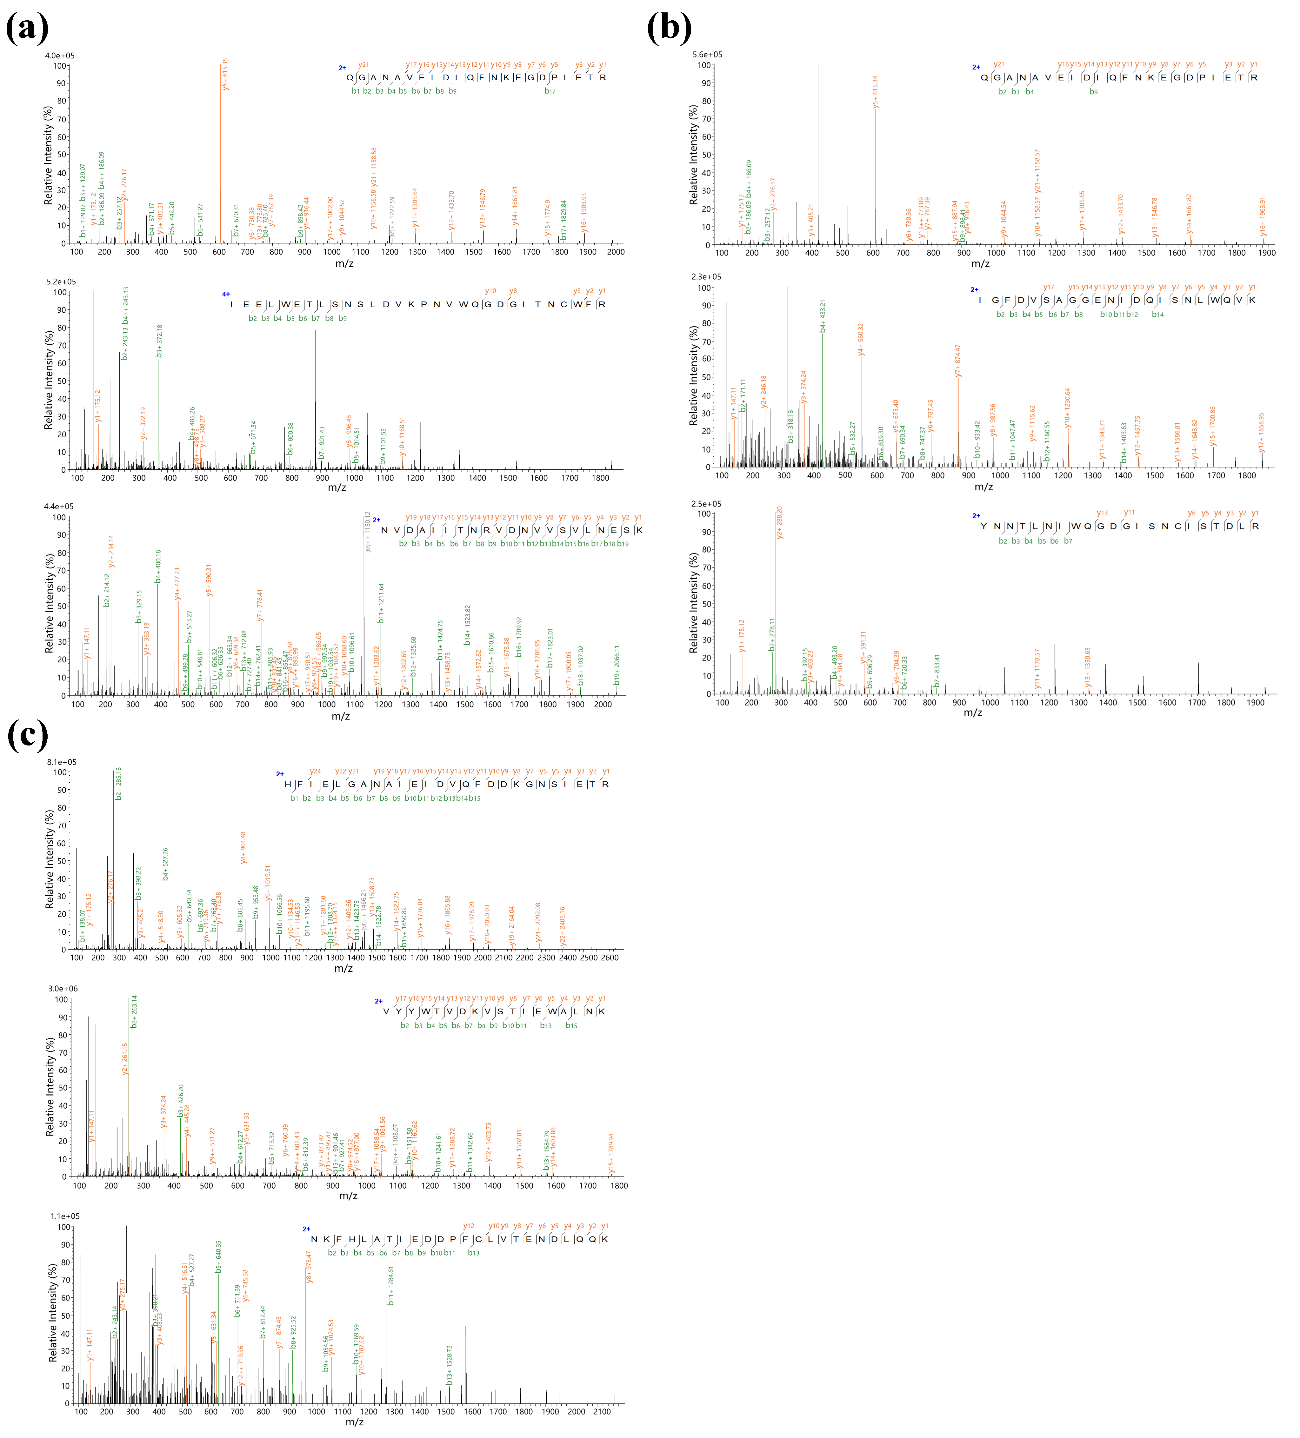


**Fig.S3** Mass spectrum, representative MS/MS spectra of three unique peptides (with well-matched b/y ion series). (a) PzDNT2; (b) PzDNT3; (c) PzDNT8. m/z, mass-to-charge ratio
